# Supplementary material for: Asymmetric localization of the cell division machinery during Bacillus subtilis sporulation
Source: eLife journal article supplement (doi:10.7554/elife.62204), 2021-05-21
Supplement: code2 [file KK421_output.xlsx]

## Sheet: Sheet1
E:\kanika\intensities_septum_IIEmutants-20191209T201052Z-001\intensities_septum_IIEmutants\KK421_masked\KK421_1.tif	E:\kanika\intensities_septum_IIEmutants-20191209T201052Z-001\intensities_septum_IIEmutants\KK421_masked\KK421_10.tif	E:\kanika\intensities_septum_IIEmutants-20191209T201052Z-001\intensities_septum_IIEmutants\KK421_masked\KK421_11.tif	E:\kanika\intensities_septum_IIEmutants-20191209T201052Z-001\intensities_septum_IIEmutants\KK421_masked\KK421_12.tif	E:\kanika\intensities_septum_IIEmutants-20191209T201052Z-001\intensities_septum_IIEmutants\KK421_masked\KK421_13.tif	E:\kanika\intensities_septum_IIEmutants-20191209T201052Z-001\intensities_septum_IIEmutants\KK421_masked\KK421_14.tif	E:\kanika\intensities_septum_IIEmutants-20191209T201052Z-001\intensities_septum_IIEmutants\KK421_masked\KK421_15.tif	E:\kanika\intensities_septum_IIEmutants-20191209T201052Z-001\intensities_septum_IIEmutants\KK421_masked\KK421_2.tif	E:\kanika\intensities_septum_IIEmutants-20191209T201052Z-001\intensities_septum_IIEmutants\KK421_masked\KK421_3.tif	E:\kanika\intensities_septum_IIEmutants-20191209T201052Z-001\intensities_septum_IIEmutants\KK421_masked\KK421_4.tif	E:\kanika\intensities_septum_IIEmutants-20191209T201052Z-001\intensities_septum_IIEmutants\KK421_masked\KK421_5.tif	E:\kanika\intensities_septum_IIEmutants-20191209T201052Z-001\intensities_septum_IIEmutants\KK421_masked\KK421_6.tif	E:\kanika\intensities_septum_IIEmutants-20191209T201052Z-001\intensities_septum_IIEmutants\KK421_masked\KK421_7.tif	E:\kanika\intensities_septum_IIEmutants-20191209T201052Z-001\intensities_septum_IIEmutants\KK421_masked\KK421_8.tif	E:\kanika\intensities_septum_IIEmutants-20191209T201052Z-001\intensities_septum_IIEmutants\KK421_masked\KK421_9.tif
1103	886	753	1029	1129	796	1173	890	1124	1017	424	648	1211	339	1157
1080	921	717	1095	906	932	1265	821	1019	992	639	806	1092	579	1027
982	948	657	1063	783	973	1203	810	836	952	781	958	846	780	782
871	943	581	1001	762	927	1031	841	692	855	806	1044	606	914	549
769	907	508	919	763	850	878	899	567	783	741	1043	457	969	398
711	852	454	834	771	804	767	953	495	722	666	996	412	961	359
679	797	423	772	786	782	727	977	470	665	613	934	427	921	370
656	753	408	705	819	791	753	970	447	630	603	873	487	914	417
616	733	406	655	843	823	816	910	436	623	645	875	557	915	478
594	748	416	635	843	838	870	858	448	647	700	903	632	930	546
589	760	414	628	797	816	874	810	484	674	741	914	741	965	647
610	782	418	624	756	811	861	749	538	699	754	917	850	1023	735
644	802	430	619	739	839	860	699	590	716	747	916	900	1138	766
678	789	429	593	735	865	880	676	639	747	731	904	913	1203	791
705	768	433	571	754	874	911	657	689	792	712	871	941	1231	830
739	751	447	576	789	878	949	649	727	846	695	875	974	1330	863
761	722	450	583	833	885	971	677	751	897	675	898	971	1368	880
756	693	451	571	879	903	967	722	762	891	633	880	982	1329	913
762	690	455	542	915	903	971	782	772	825	599	889	1015	1340	953
749	694	467	535	909	893	961	838	788	770	569	936	1086	1354	1027
728	698	472	558	901	896	934	879	814	739	527	1022	1148	1370	1081
678	686	468	596	895	920	920	891	819	718	495	1075	1172	1364	1089
647	681	467	648	895	941	892	884	823	691	483	1093	1147	1353	1097
638	675	461	705	916	953	854	889	823	687	477	1090	1094	1345	1064
629	645	445	737	952	948	843	867	809	698	487	1064	1046	1326	1027
637	615	436	700	994	932	821	852	820	718	506	1046	967	1325	981
660	606	438	640	1026	923	800	838	832	740	520	1033	891	1357	912
679	607	436	596	1031	901	777	785	826	767	523	1021	836	1400	845
682	610	440	574	1023	869	745	732	802	762	542	1022	761	1384	780
657	607	436	580	977	844	704	672	791	757	547	1018	729	1376	731
629	597	444	572	971	806	689	623	787	767	517	1002	748	1370	741
608	607	455	542	992	762	680	605	785	733	482	989	823	1331	806
563	665	452	530	1007	744	647	599	789	687	462	957	984	1272	950
506	827	444	545	1068	727	596	591	894	643	463	938	1252	1170	1230
496	1139	444	606	1140	708	579	590	1181	605	495	913	1540	1107	1553
490	1568	441	801	1208	672	608	654	1591	584	611	869	1612	1091	1704
483	1916	442	1190	1241	638	741	873	1961	602	876	836	1413	1054	1547
483	1888	446	1661	1226	633	1058	1235	2035	724	1212	807	1072	1059	1190
480	1538	444	1921	1125	676	1538	1609	1713	1025	1421	761	752	1182	831
479	1163	420	1748	1013	796	2000	1756	1257	1500	1388	823	576	1446	610
471	923	401	1277	952	1003	2135	1551	914	1963	1176	1006	579	1770	563
469	877	458	840	952	1208	1859	1224	756	2022	921	1296	765	1964	679
523	1015	611	617	936	1300	1381	947	719	1604	747	1636	1130	1897	953
695	1122	806	592	896	1207	1010	776	751	1069	699	1754	1636	1566	1372
960	1061	971	694	839	1039	826	718	769	714	756	1567	2087	1197
1231	858	1003	831	798	928	756	737	752	578		1269		973
1389		891	920		897	742	792	721	568		1048		956
1322		716			946	710	845	709	616		942		1065
1055		566			1064		879		627		922		1190
783		490			1155				548		968		1216
625		494			1126				392		1044
584		571			1022						1124
639		697			861
802		813
981		862
1044		828

## Sheet: Sheet2
E:\kanika\intensities_septum_IIEmutants-20191209T201052Z-001\intensities_septum_IIEmutants\KK421_masked\KK421_1.tif	E:\kanika\intensities_septum_IIEmutants-20191209T201052Z-001\intensities_septum_IIEmutants\KK421_masked\KK421_10.tif	E:\kanika\intensities_septum_IIEmutants-20191209T201052Z-001\intensities_septum_IIEmutants\KK421_masked\KK421_11.tif	E:\kanika\intensities_septum_IIEmutants-20191209T201052Z-001\intensities_septum_IIEmutants\KK421_masked\KK421_12.tif	E:\kanika\intensities_septum_IIEmutants-20191209T201052Z-001\intensities_septum_IIEmutants\KK421_masked\KK421_13.tif	E:\kanika\intensities_septum_IIEmutants-20191209T201052Z-001\intensities_septum_IIEmutants\KK421_masked\KK421_14.tif	E:\kanika\intensities_septum_IIEmutants-20191209T201052Z-001\intensities_septum_IIEmutants\KK421_masked\KK421_15.tif	E:\kanika\intensities_septum_IIEmutants-20191209T201052Z-001\intensities_septum_IIEmutants\KK421_masked\KK421_2.tif	E:\kanika\intensities_septum_IIEmutants-20191209T201052Z-001\intensities_septum_IIEmutants\KK421_masked\KK421_3.tif	E:\kanika\intensities_septum_IIEmutants-20191209T201052Z-001\intensities_septum_IIEmutants\KK421_masked\KK421_4.tif	E:\kanika\intensities_septum_IIEmutants-20191209T201052Z-001\intensities_septum_IIEmutants\KK421_masked\KK421_5.tif	E:\kanika\intensities_septum_IIEmutants-20191209T201052Z-001\intensities_septum_IIEmutants\KK421_masked\KK421_6.tif	E:\kanika\intensities_septum_IIEmutants-20191209T201052Z-001\intensities_septum_IIEmutants\KK421_masked\KK421_7.tif	E:\kanika\intensities_septum_IIEmutants-20191209T201052Z-001\intensities_septum_IIEmutants\KK421_masked\KK421_8.tif	E:\kanika\intensities_septum_IIEmutants-20191209T201052Z-001\intensities_septum_IIEmutants\KK421_masked\KK421_9.tif
30	21	0	35	67	14	54	28	120	29	25	34	131	24	161
61	19	0	133	142	90	52	41	216	22	93	64	106	74	121
106	16	11	261	215	196	149	83	283	46	177	125	167	140	174
143	20	48	353	287	298	291	130	318	100	244	216	223	210	228
179	57	97	402	349	415	436	162	350	143	304	305	276	275	285
204	105	138	438	389	506	524	184	352	181	365	394	320	320	331
250	143	168	501	414	567	609	197	348	212	408	487	345	361	347
278	171	191	546	400	618	718	197	345	220	445	546	348	383	351
271	191	207	562	394	666	841	207	331	235	455	562	354	415	356
266	186	215	579	384	664	934	208	337	234	448	568	370	449	363
268	171	204	582	386	638	926	211	343	240	453	566	373	472	368
264	173	186	569	389	597	871	218	356	253	462	553	408	459	401
259	183	169	548	372	574	806	207	363	259	460	554	455	432	444
262	189	160	555	367	556	787	190	359	278	439	553	454	401	448
278	198	170	581	389	546	768	170	336	296	430	541	453	375	452
278	193	187	590	407	548	761	160	321	296	434	549	461	357	458
257	184	197	610	421	555	759	156	326	284	429	566	488	369	478
235	168	197	632	425	560	759	152	324	268	424	548	509	385	503
244	165	192	625	424	553	761	159	306	250	434	524	502	381	510
258	166	178	576	428	531	768	181	280	252	438	517	496	378	494
258	160	174	531	461	538	786	192	243	256	427	530	516	374	512
253	169	179	516	475	563	813	197	230	268	411	543	535	372	534
256	172	182	505	460	583	795	220	228	281	401	530	542	368	538
269	199	190	482	459	600	778	239	215	285	404	546	543	355	539
290	223	189	462	464	644	763	236	200	298	421	558	530	365	528
314	249	192	454	489	692	763	233	206	280	428	540	527	395	521
315	269	205	453	513	721	770	235	213	259	448	550	515	406	503
300	268	207	446	526	732	760	239	233	244	456	562	500	381	498
280	254	207	438	542	729	781	225	242	235	436	565	517	379	509
267	268	221	426	540	728	793	207	238	240	431	545	539	380	528
274	302	225	412	536	719	791	223	246	246	441	523	530	377	522
291	331	213	370	528	702	786	248	239	259	425	526	526	368	520
303	340	210	325	549	701	777	251	226	260	404	534	560	349	542
316	364	209	374	613	696	778	258	244	239	404	529	759	337	689
324	416	204	698	716	706	771	265	303	229	412	505	1255	312	1136
334	509	207	1275	847	727	776	262	426	226	447	506	1686	292	1624
335	608	200	1687	919	741	903	291	582	236	553	509	1756	279	1752
342	605	190	1842	849	759	1237	402	669	308	679	507	1474	270	1542
342	494	185	1811	685	772	1563	601	594	474	755	509	919	290	1036
347	345	191	1626	533	835	1594	753	434	794	732	506	510	367	550
354	243	198	1149	419	993	1417	692	304	1112	603	574	345	518	359
349	182	212	624	332	1188	1005	496	225	1133	437	778	259	636	265
344	126	264	435	239	1301	562	315	178	828	300	1096	178	584	185
401	70	373	384	121	1271	335	197	139	489	210	1326	98	452	114
583	24	513	345	28	1103	208	129	108	314	137	1217	45	302
849	2	608	273	3	918	96	96	86	253		882		172
1003		558	160		787	23	71	71	208		610		90
916		401			709	0	35	74	144		447		28
661		267			630		11		78		354		2
435		200			523				24		298		3
319		174			390				1		218
258		152			248						115
214		108			126
177		67
142		41
83		50

## Sheet: Sheet3
E:\kanika\intensities_septum_IIEmutants-20191209T201052Z-001\intensities_septum_IIEmutants\KK421_masked\KK421_1.tif	E:\kanika\intensities_septum_IIEmutants-20191209T201052Z-001\intensities_septum_IIEmutants\KK421_masked\KK421_10.tif	E:\kanika\intensities_septum_IIEmutants-20191209T201052Z-001\intensities_septum_IIEmutants\KK421_masked\KK421_11.tif	E:\kanika\intensities_septum_IIEmutants-20191209T201052Z-001\intensities_septum_IIEmutants\KK421_masked\KK421_12.tif	E:\kanika\intensities_septum_IIEmutants-20191209T201052Z-001\intensities_septum_IIEmutants\KK421_masked\KK421_13.tif	E:\kanika\intensities_septum_IIEmutants-20191209T201052Z-001\intensities_septum_IIEmutants\KK421_masked\KK421_14.tif	E:\kanika\intensities_septum_IIEmutants-20191209T201052Z-001\intensities_septum_IIEmutants\KK421_masked\KK421_15.tif	E:\kanika\intensities_septum_IIEmutants-20191209T201052Z-001\intensities_septum_IIEmutants\KK421_masked\KK421_2.tif	E:\kanika\intensities_septum_IIEmutants-20191209T201052Z-001\intensities_septum_IIEmutants\KK421_masked\KK421_3.tif	E:\kanika\intensities_septum_IIEmutants-20191209T201052Z-001\intensities_septum_IIEmutants\KK421_masked\KK421_4.tif	E:\kanika\intensities_septum_IIEmutants-20191209T201052Z-001\intensities_septum_IIEmutants\KK421_masked\KK421_5.tif	E:\kanika\intensities_septum_IIEmutants-20191209T201052Z-001\intensities_septum_IIEmutants\KK421_masked\KK421_6.tif	E:\kanika\intensities_septum_IIEmutants-20191209T201052Z-001\intensities_septum_IIEmutants\KK421_masked\KK421_7.tif	E:\kanika\intensities_septum_IIEmutants-20191209T201052Z-001\intensities_septum_IIEmutants\KK421_masked\KK421_8.tif	E:\kanika\intensities_septum_IIEmutants-20191209T201052Z-001\intensities_septum_IIEmutants\KK421_masked\KK421_9.tif
0.0178571	0.0217391	0.0178571	0.0212766	0.0217391	0.0188679	0.0208333	0.0204082	0.0208333	0.0196078	0.0222222	0.0192308	0.0222222	0.02	0.0227273
0.0357143	0.0434783	0.0357143	0.0425532	0.0434783	0.0377358	0.0416667	0.0408163	0.0416667	0.0392157	0.0444444	0.0384615	0.0444444	0.04	0.0454545
0.0535714	0.0652174	0.0535714	0.0638298	0.0652174	0.0566038	0.0625	0.0612245	0.0625	0.0588235	0.0666667	0.0576923	0.0666667	0.06	0.0681818
0.0714286	0.0869565	0.0714286	0.0851064	0.0869565	0.0754717	0.0833333	0.0816327	0.0833333	0.0784314	0.0888889	0.0769231	0.0888889	0.08	0.0909091
0.0892857	0.108696	0.0892857	0.106383	0.108696	0.0943396	0.104167	0.102041	0.104167	0.0980392	0.111111	0.0961538	0.111111	0.1	0.113636
0.107143	0.130435	0.107143	0.12766	0.130435	0.113208	0.125	0.122449	0.125	0.117647	0.133333	0.115385	0.133333	0.12	0.136364
0.125	0.152174	0.125	0.148936	0.152174	0.132075	0.145833	0.142857	0.145833	0.137255	0.155556	0.134615	0.155556	0.14	0.159091
0.142857	0.173913	0.142857	0.170213	0.173913	0.150943	0.166667	0.163265	0.166667	0.156863	0.177778	0.153846	0.177778	0.16	0.181818
0.160714	0.195652	0.160714	0.191489	0.195652	0.169811	0.1875	0.183673	0.1875	0.176471	0.2	0.173077	0.2	0.18	0.204545
0.178571	0.217391	0.178571	0.212766	0.217391	0.188679	0.208333	0.204082	0.208333	0.196078	0.222222	0.192308	0.222222	0.2	0.227273
0.196429	0.23913	0.196429	0.234043	0.23913	0.207547	0.229167	0.22449	0.229167	0.215686	0.244444	0.211538	0.244444	0.22	0.25
0.214286	0.26087	0.214286	0.255319	0.26087	0.226415	0.25	0.244898	0.25	0.235294	0.266667	0.230769	0.266667	0.24	0.272727
0.232143	0.282609	0.232143	0.276596	0.282609	0.245283	0.270833	0.265306	0.270833	0.254902	0.288889	0.25	0.288889	0.26	0.295455
0.25	0.304348	0.25	0.297872	0.304348	0.264151	0.291667	0.285714	0.291667	0.27451	0.311111	0.269231	0.311111	0.28	0.318182
0.267857	0.326087	0.267857	0.319149	0.326087	0.283019	0.3125	0.306122	0.3125	0.294118	0.333333	0.288462	0.333333	0.3	0.340909
0.285714	0.347826	0.285714	0.340426	0.347826	0.301887	0.333333	0.326531	0.333333	0.313725	0.355556	0.307692	0.355556	0.32	0.363636
0.303571	0.369565	0.303571	0.361702	0.369565	0.320755	0.354167	0.346939	0.354167	0.333333	0.377778	0.326923	0.377778	0.34	0.386364
0.321429	0.391304	0.321429	0.382979	0.391304	0.339623	0.375	0.367347	0.375	0.352941	0.4	0.346154	0.4	0.36	0.409091
0.339286	0.413043	0.339286	0.404255	0.413043	0.358491	0.395833	0.387755	0.395833	0.372549	0.422222	0.365385	0.422222	0.38	0.431818
0.357143	0.434783	0.357143	0.425532	0.434783	0.377358	0.416667	0.408163	0.416667	0.392157	0.444444	0.384615	0.444444	0.4	0.454545
0.375	0.456522	0.375	0.446809	0.456522	0.396226	0.4375	0.428571	0.4375	0.411765	0.466667	0.403846	0.466667	0.42	0.477273
0.392857	0.478261	0.392857	0.468085	0.478261	0.415094	0.458333	0.44898	0.458333	0.431373	0.488889	0.423077	0.488889	0.44	0.5
0.410714	0.5	0.410714	0.489362	0.5	0.433962	0.479167	0.469388	0.479167	0.45098	0.511111	0.442308	0.511111	0.46	0.522727
0.428571	0.521739	0.428571	0.510638	0.521739	0.45283	0.5	0.489796	0.5	0.470588	0.533333	0.461538	0.533333	0.48	0.545455
0.446429	0.543478	0.446429	0.531915	0.543478	0.471698	0.520833	0.510204	0.520833	0.490196	0.555556	0.480769	0.555556	0.5	0.568182
0.464286	0.565217	0.464286	0.553191	0.565217	0.490566	0.541667	0.530612	0.541667	0.509804	0.577778	0.5	0.577778	0.52	0.590909
0.482143	0.586957	0.482143	0.574468	0.586957	0.509434	0.5625	0.55102	0.5625	0.529412	0.6	0.519231	0.6	0.54	0.613636
0.5	0.608696	0.5	0.595745	0.608696	0.528302	0.583333	0.571429	0.583333	0.54902	0.622222	0.538462	0.622222	0.56	0.636364
0.517857	0.630435	0.517857	0.617021	0.630435	0.54717	0.604167	0.591837	0.604167	0.568627	0.644444	0.557692	0.644444	0.58	0.659091
0.535714	0.652174	0.535714	0.638298	0.652174	0.566038	0.625	0.612245	0.625	0.588235	0.666667	0.576923	0.666667	0.6	0.681818
0.553571	0.673913	0.553571	0.659574	0.673913	0.584906	0.645833	0.632653	0.645833	0.607843	0.688889	0.596154	0.688889	0.62	0.704545
0.571429	0.695652	0.571429	0.680851	0.695652	0.603774	0.666667	0.653061	0.666667	0.627451	0.711111	0.615385	0.711111	0.64	0.727273
0.589286	0.717391	0.589286	0.702128	0.717391	0.622642	0.6875	0.673469	0.6875	0.647059	0.733333	0.634615	0.733333	0.66	0.75
0.607143	0.73913	0.607143	0.723404	0.73913	0.641509	0.708333	0.693878	0.708333	0.666667	0.755556	0.653846	0.755556	0.68	0.772727
0.625	0.76087	0.625	0.744681	0.76087	0.660377	0.729167	0.714286	0.729167	0.686275	0.777778	0.673077	0.777778	0.7	0.795455
0.642857	0.782609	0.642857	0.765957	0.782609	0.679245	0.75	0.734694	0.75	0.705882	0.8	0.692308	0.8	0.72	0.818182
0.660714	0.804348	0.660714	0.787234	0.804348	0.698113	0.770833	0.755102	0.770833	0.72549	0.822222	0.711538	0.822222	0.74	0.840909
0.678571	0.826087	0.678571	0.808511	0.826087	0.716981	0.791667	0.77551	0.791667	0.745098	0.844444	0.730769	0.844444	0.76	0.863636
0.696429	0.847826	0.696429	0.829787	0.847826	0.735849	0.8125	0.795918	0.8125	0.764706	0.866667	0.75	0.866667	0.78	0.886364
0.714286	0.869565	0.714286	0.851064	0.869565	0.754717	0.833333	0.816327	0.833333	0.784314	0.888889	0.769231	0.888889	0.8	0.909091
0.732143	0.891304	0.732143	0.87234	0.891304	0.773585	0.854167	0.836735	0.854167	0.803922	0.911111	0.788462	0.911111	0.82	0.931818
0.75	0.913043	0.75	0.893617	0.913043	0.792453	0.875	0.857143	0.875	0.823529	0.933333	0.807692	0.933333	0.84	0.954545
0.767857	0.934783	0.767857	0.914894	0.934783	0.811321	0.895833	0.877551	0.895833	0.843137	0.955556	0.826923	0.955556	0.86	0.977273
0.785714	0.956522	0.785714	0.93617	0.956522	0.830189	0.916667	0.897959	0.916667	0.862745	0.977778	0.846154	0.977778	0.88	1
0.803571	0.978261	0.803571	0.957447	0.978261	0.849057	0.9375	0.918367	0.9375	0.882353	1	0.865385	1	0.9
0.821429	1	0.821429	0.978723	1	0.867925	0.958333	0.938776	0.958333	0.901961		0.884615		0.92
0.839286		0.839286	1		0.886792	0.979167	0.959184	0.979167	0.921569		0.903846		0.94
0.857143		0.857143			0.90566	1	0.979592	1	0.941176		0.923077		0.96
0.875		0.875			0.924528		1		0.960784		0.942308		0.98
0.892857		0.892857			0.943396				0.980392		0.961538		1
0.910714		0.910714			0.962264				1		0.980769
0.928571		0.928571			0.981132						1
0.946429		0.946429			1
0.964286		0.964286
0.982143		0.982143
1		1

## Sheet: Sheet4
E:\kanika\intensities_septum_IIEmutants-20191209T201052Z-001\intensities_septum_IIEmutants\KK421_masked\KK421_1.tif	E:\kanika\intensities_septum_IIEmutants-20191209T201052Z-001\intensities_septum_IIEmutants\KK421_masked\KK421_1.tif	E:\kanika\intensities_septum_IIEmutants-20191209T201052Z-001\intensities_septum_IIEmutants\KK421_masked\KK421_10.tif	E:\kanika\intensities_septum_IIEmutants-20191209T201052Z-001\intensities_septum_IIEmutants\KK421_masked\KK421_10.tif	E:\kanika\intensities_septum_IIEmutants-20191209T201052Z-001\intensities_septum_IIEmutants\KK421_masked\KK421_11.tif	E:\kanika\intensities_septum_IIEmutants-20191209T201052Z-001\intensities_septum_IIEmutants\KK421_masked\KK421_11.tif	E:\kanika\intensities_septum_IIEmutants-20191209T201052Z-001\intensities_septum_IIEmutants\KK421_masked\KK421_12.tif	E:\kanika\intensities_septum_IIEmutants-20191209T201052Z-001\intensities_septum_IIEmutants\KK421_masked\KK421_12.tif	E:\kanika\intensities_septum_IIEmutants-20191209T201052Z-001\intensities_septum_IIEmutants\KK421_masked\KK421_13.tif	E:\kanika\intensities_septum_IIEmutants-20191209T201052Z-001\intensities_septum_IIEmutants\KK421_masked\KK421_13.tif	E:\kanika\intensities_septum_IIEmutants-20191209T201052Z-001\intensities_septum_IIEmutants\KK421_masked\KK421_14.tif	E:\kanika\intensities_septum_IIEmutants-20191209T201052Z-001\intensities_septum_IIEmutants\KK421_masked\KK421_14.tif	E:\kanika\intensities_septum_IIEmutants-20191209T201052Z-001\intensities_septum_IIEmutants\KK421_masked\KK421_15.tif	E:\kanika\intensities_septum_IIEmutants-20191209T201052Z-001\intensities_septum_IIEmutants\KK421_masked\KK421_15.tif	E:\kanika\intensities_septum_IIEmutants-20191209T201052Z-001\intensities_septum_IIEmutants\KK421_masked\KK421_2.tif	E:\kanika\intensities_septum_IIEmutants-20191209T201052Z-001\intensities_septum_IIEmutants\KK421_masked\KK421_2.tif	E:\kanika\intensities_septum_IIEmutants-20191209T201052Z-001\intensities_septum_IIEmutants\KK421_masked\KK421_3.tif	E:\kanika\intensities_septum_IIEmutants-20191209T201052Z-001\intensities_septum_IIEmutants\KK421_masked\KK421_3.tif	E:\kanika\intensities_septum_IIEmutants-20191209T201052Z-001\intensities_septum_IIEmutants\KK421_masked\KK421_4.tif	E:\kanika\intensities_septum_IIEmutants-20191209T201052Z-001\intensities_septum_IIEmutants\KK421_masked\KK421_4.tif	E:\kanika\intensities_septum_IIEmutants-20191209T201052Z-001\intensities_septum_IIEmutants\KK421_masked\KK421_5.tif	E:\kanika\intensities_septum_IIEmutants-20191209T201052Z-001\intensities_septum_IIEmutants\KK421_masked\KK421_5.tif	E:\kanika\intensities_septum_IIEmutants-20191209T201052Z-001\intensities_septum_IIEmutants\KK421_masked\KK421_6.tif	E:\kanika\intensities_septum_IIEmutants-20191209T201052Z-001\intensities_septum_IIEmutants\KK421_masked\KK421_6.tif	E:\kanika\intensities_septum_IIEmutants-20191209T201052Z-001\intensities_septum_IIEmutants\KK421_masked\KK421_7.tif	E:\kanika\intensities_septum_IIEmutants-20191209T201052Z-001\intensities_septum_IIEmutants\KK421_masked\KK421_7.tif	E:\kanika\intensities_septum_IIEmutants-20191209T201052Z-001\intensities_septum_IIEmutants\KK421_masked\KK421_8.tif	E:\kanika\intensities_septum_IIEmutants-20191209T201052Z-001\intensities_septum_IIEmutants\KK421_masked\KK421_8.tif	E:\kanika\intensities_septum_IIEmutants-20191209T201052Z-001\intensities_septum_IIEmutants\KK421_masked\KK421_9.tif	E:\kanika\intensities_septum_IIEmutants-20191209T201052Z-001\intensities_septum_IIEmutants\KK421_masked\KK421_9.tif
0.0178571	0.00171536	0.0217391	0.00211886	0.0178571	0	0.0212766	0.00124197	0.0217391	0.00336768	0.0188679	0.000414606	0.0208333	0.00158833	0.0204082	0.00253165	0.0208333	0.00875274	0.0196078	0.00198644	0.0222222	0.00134633	0.0192308	0.00124497	0.0222222	0.00559757	0.02	0.00145781	0.0227273	0.00690424
0.0357143	0.00348791	0.0434783	0.00191706	0.0357143	0	0.0425532	0.00471949	0.0434783	0.00713747	0.0377358	0.00266532	0.0416667	0.0015295	0.0408163	0.00370705	0.0416667	0.0157549	0.0392157	0.00150695	0.0444444	0.00500835	0.0384615	0.00234346	0.0444444	0.00452933	0.04	0.00449493	0.0454545	0.0051889
0.0535714	0.00606095	0.0652174	0.00161437	0.0535714	0.00099269	0.0638298	0.00926156	0.0652174	0.0108067	0.0566038	0.00580448	0.0625	0.00438261	0.0612245	0.00750452	0.0625	0.0206419	0.0588235	0.0031509	0.0666667	0.00953202	0.0576923	0.00457708	0.0666667	0.00713584	0.06	0.00850392	0.0681818	0.00746173
0.0714286	0.00817657	0.0869565	0.00201796	0.0714286	0.00433174	0.0851064	0.0125262	0.0869565	0.0144257	0.0754717	0.00882518	0.0833333	0.00855933	0.0816327	0.0117541	0.0833333	0.0231947	0.0784314	0.00684978	0.0888889	0.0131402	0.0769231	0.00790919	0.0888889	0.00952869	0.08	0.0127559	0.0909091	0.00977743
0.0892857	0.010235	0.108696	0.00575119	0.0892857	0.00875372	0.106383	0.0142649	0.108696	0.0175421	0.0943396	0.0122901	0.104167	0.0128243	0.102041	0.0146474	0.104167	0.0255288	0.0980392	0.00979519	0.111111	0.0163714	0.0961538	0.0111681	0.111111	0.0117934	0.1	0.0167041	0.113636	0.0122218
0.107143	0.0116645	0.130435	0.0105943	0.107143	0.0124537	0.12766	0.0155424	0.130435	0.0195527	0.113208	0.014985	0.125	0.0154127	0.122449	0.0166365	0.125	0.0256747	0.117647	0.0123981	0.133333	0.0196564	0.115385	0.0144269	0.133333	0.0136735	0.12	0.0194375	0.136364	0.0141944
0.125	0.0142947	0.152174	0.0144284	0.125	0.0151611	0.148936	0.0177779	0.152174	0.0208092	0.132075	0.0167915	0.145833	0.0179128	0.142857	0.0178119	0.145833	0.0253829	0.137255	0.0145215	0.155556	0.0219721	0.134615	0.0178323	0.155556	0.0147417	0.14	0.021928	0.159091	0.0148806
0.142857	0.0158957	0.173913	0.0172536	0.142857	0.0172367	0.170213	0.0193748	0.173913	0.0201056	0.150943	0.0183019	0.166667	0.0211189	0.163265	0.0178119	0.166667	0.0251641	0.156863	0.0150695	0.177778	0.0239647	0.153846	0.0199927	0.177778	0.0148699	0.16	0.0232643	0.181818	0.0150521
0.160714	0.0154955	0.195652	0.0192715	0.160714	0.0186806	0.191489	0.0199425	0.195652	0.019804	0.169811	0.0197234	0.1875	0.0247367	0.183673	0.0187161	0.1875	0.024143	0.176471	0.016097	0.2	0.0245032	0.173077	0.0205785	0.2	0.0151263	0.18	0.025208	0.204545	0.0152665
0.178571	0.0152096	0.217391	0.018767	0.178571	0.0194026	0.212766	0.0205458	0.217391	0.0193013	0.188679	0.0196642	0.208333	0.0274722	0.204082	0.0188065	0.208333	0.0245806	0.196078	0.0160285	0.222222	0.0241262	0.192308	0.0207982	0.222222	0.0158099	0.2	0.0272733	0.227273	0.0155667
0.196429	0.0153239	0.23913	0.0172536	0.196429	0.0184099	0.234043	0.0206522	0.23913	0.0194019	0.207547	0.0188942	0.229167	0.0272369	0.22449	0.0190778	0.229167	0.0250182	0.215686	0.0164395	0.244444	0.0243955	0.211538	0.020725	0.244444	0.0159381	0.22	0.0286704	0.25	0.0157811
0.214286	0.0150952	0.26087	0.0174554	0.214286	0.0167855	0.255319	0.0201909	0.26087	0.0195527	0.226415	0.01768	0.25	0.0256192	0.244898	0.0197107	0.25	0.0259664	0.235294	0.01733	0.266667	0.0248802	0.230769	0.020249	0.266667	0.0174337	0.24	0.0278807	0.272727	0.0171963
0.232143	0.0148093	0.282609	0.0184643	0.232143	0.0152513	0.276596	0.0194457	0.282609	0.0186982	0.245283	0.0169988	0.270833	0.0237073	0.265306	0.0187161	0.270833	0.026477	0.254902	0.0177409	0.288889	0.0247725	0.25	0.0202856	0.288889	0.019442	0.26	0.0262407	0.295455	0.0190403
0.25	0.0149808	0.304348	0.0190697	0.25	0.0144391	0.297872	0.0196941	0.304348	0.0184468	0.264151	0.0164658	0.291667	0.0231484	0.285714	0.017179	0.291667	0.0261853	0.27451	0.0190424	0.311111	0.0236416	0.269231	0.020249	0.311111	0.0193992	0.28	0.0243577	0.318182	0.0192118
0.267857	0.0158957	0.326087	0.0199778	0.267857	0.0153416	0.319149	0.0206167	0.326087	0.0195527	0.283019	0.0161696	0.3125	0.0225896	0.306122	0.0153707	0.3125	0.0245077	0.294118	0.0202754	0.333333	0.0231569	0.288462	0.0198096	0.333333	0.0193565	0.3	0.0227784	0.340909	0.0193833
0.285714	0.0158957	0.347826	0.0194733	0.285714	0.0168757	0.340426	0.0209361	0.347826	0.0204574	0.301887	0.0162289	0.333333	0.0223837	0.326531	0.0144665	0.333333	0.0234136	0.313725	0.0202754	0.355556	0.0233723	0.307692	0.0201025	0.355556	0.0196983	0.32	0.021685	0.363636	0.0196406
0.303571	0.014695	0.369565	0.0185652	0.303571	0.0177782	0.361702	0.0216458	0.369565	0.0211611	0.320755	0.0164362	0.354167	0.0223248	0.346939	0.0141049	0.354167	0.0237783	0.333333	0.0194534	0.377778	0.023103	0.326923	0.020725	0.377778	0.020852	0.34	0.0224139	0.386364	0.0204983
0.321429	0.013437	0.391304	0.0169509	0.321429	0.0177782	0.382979	0.0224265	0.391304	0.0213622	0.339623	0.0165842	0.375	0.0223248	0.367347	0.0137432	0.375	0.0236324	0.352941	0.0183574	0.4	0.0228338	0.346154	0.0200659	0.4	0.0217493	0.36	0.0233858	0.409091	0.0215704
0.339286	0.0139516	0.413043	0.0166482	0.339286	0.017327	0.404255	0.0221781	0.413043	0.0213119	0.358491	0.0163769	0.395833	0.0223837	0.387755	0.0143761	0.395833	0.0223195	0.372549	0.0171245	0.422222	0.0233723	0.365385	0.0191871	0.422222	0.0214502	0.38	0.0231428	0.431818	0.0218706
0.357143	0.0147521	0.434783	0.0167491	0.357143	0.0160635	0.425532	0.0204393	0.434783	0.0215129	0.377358	0.0157254	0.416667	0.0225896	0.408163	0.0163653	0.416667	0.020423	0.392157	0.0172615	0.444444	0.0235877	0.384615	0.0189308	0.444444	0.0211939	0.4	0.0229606	0.454545	0.0211844
0.375	0.0147521	0.456522	0.0161437	0.375	0.0157026	0.446809	0.0188425	0.456522	0.0231717	0.396226	0.0159327	0.4375	0.023119	0.428571	0.0173599	0.4375	0.0177243	0.411765	0.0175354	0.466667	0.0229953	0.403846	0.0194068	0.466667	0.0220485	0.42	0.0227176	0.477273	0.0219563
0.392857	0.0144662	0.478261	0.0170518	0.392857	0.0161538	0.468085	0.0183102	0.478261	0.0238753	0.415094	0.0166731	0.458333	0.0239132	0.44898	0.0178119	0.458333	0.0167761	0.431373	0.0183574	0.488889	0.0221337	0.423077	0.0198828	0.488889	0.0228603	0.44	0.0225961	0.5	0.0228998
0.410714	0.0146378	0.5	0.0173545	0.410714	0.0164245	0.489362	0.0179199	0.5	0.0231214	0.433962	0.0172654	0.479167	0.0233837	0.469388	0.0198915	0.479167	0.0166302	0.45098	0.0192479	0.511111	0.0215951	0.442308	0.0194068	0.511111	0.0231594	0.46	0.0223532	0.522727	0.0230713
0.428571	0.0153811	0.521739	0.0200787	0.428571	0.0171465	0.510638	0.0171037	0.521739	0.0230711	0.45283	0.0177688	0.5	0.0228837	0.489796	0.0216094	0.5	0.015682	0.470588	0.0195219	0.533333	0.0217567	0.461538	0.0199927	0.533333	0.0232022	0.48	0.0215635	0.545455	0.0231142
0.446429	0.0165819	0.543478	0.0225003	0.446429	0.0170562	0.531915	0.016394	0.543478	0.0233224	0.471698	0.0190719	0.520833	0.0224425	0.510204	0.0213382	0.520833	0.0145879	0.490196	0.0204124	0.555556	0.0226722	0.480769	0.0204321	0.555556	0.0226467	0.5	0.0221709	0.568182	0.0226425
0.464286	0.0179541	0.565217	0.0251236	0.464286	0.017327	0.553191	0.0161101	0.565217	0.024579	0.490566	0.0204934	0.541667	0.0224425	0.530612	0.0210669	0.541667	0.0150255	0.509804	0.0191794	0.577778	0.0230492	0.5	0.019773	0.577778	0.0225185	0.52	0.0239932	0.590909	0.0223423
0.482143	0.0180113	0.586957	0.0271416	0.482143	0.0185001	0.574468	0.0160747	0.586957	0.0257854	0.509434	0.0213522	0.5625	0.0226484	0.55102	0.0212477	0.5625	0.0155361	0.529412	0.0177409	0.6	0.0241262	0.519231	0.0201391	0.6	0.0220057	0.54	0.0246614	0.613636	0.0215704
0.5	0.0171536	0.608696	0.0270407	0.5	0.0186806	0.595745	0.0158263	0.608696	0.0264388	0.528302	0.021678	0.583333	0.0223543	0.571429	0.0216094	0.583333	0.0169949	0.54902	0.0167135	0.622222	0.0245571	0.538462	0.0205785	0.622222	0.0213648	0.56	0.0231428	0.636364	0.021356
0.517857	0.0160101	0.630435	0.0256281	0.517857	0.0186806	0.617021	0.0155424	0.630435	0.027243	0.54717	0.0215891	0.604167	0.0229719	0.591837	0.0203436	0.604167	0.0176513	0.568627	0.016097	0.644444	0.02348	0.557692	0.0206884	0.644444	0.0220912	0.58	0.0230213	0.659091	0.0218277
0.535714	0.0152667	0.652174	0.0270407	0.535714	0.019944	0.638298	0.0151166	0.652174	0.0271425	0.566038	0.0215595	0.625	0.0233249	0.612245	0.0187161	0.625	0.0173596	0.588235	0.0164395	0.666667	0.0232107	0.576923	0.0199561	0.666667	0.0230312	0.6	0.0230821	0.681818	0.0226425
0.553571	0.015667	0.673913	0.0304712	0.553571	0.020305	0.659574	0.0146198	0.673913	0.0269414	0.584906	0.021293	0.645833	0.0232661	0.632653	0.0201627	0.645833	0.0179431	0.607843	0.0168505	0.688889	0.0237493	0.596154	0.0191505	0.688889	0.0226467	0.62	0.0228998	0.704545	0.0223852
0.571429	0.016639	0.695652	0.0333972	0.571429	0.0192221	0.680851	0.0131294	0.695652	0.0265393	0.603774	0.0207895	0.666667	0.023119	0.653061	0.0224231	0.666667	0.0174325	0.627451	0.0177409	0.711111	0.0228876	0.615385	0.0192603	0.711111	0.0224758	0.64	0.0223532	0.727273	0.0222994
0.589286	0.0173252	0.717391	0.0343053	0.589286	0.0189514	0.702128	0.0115326	0.717391	0.0275949	0.622642	0.0207599	0.6875	0.0228543	0.673469	0.0226944	0.6875	0.0164843	0.647059	0.0178094	0.733333	0.0217567	0.634615	0.0195533	0.733333	0.0239286	0.66	0.0211991	0.75	0.0232428
0.607143	0.0180685	0.73913	0.0367269	0.607143	0.0188611	0.723404	0.0132714	0.73913	0.0308118	0.641509	0.0206118	0.708333	0.0228837	0.693878	0.0233273	0.708333	0.0177972	0.666667	0.016371	0.755556	0.0217567	0.653846	0.0193702	0.755556	0.0324317	0.68	0.0204701	0.772727	0.0295467
0.625	0.0185259	0.76087	0.0419736	0.625	0.0184099	0.744681	0.0247685	0.76087	0.0359889	0.660377	0.020908	0.729167	0.0226778	0.714286	0.0239602	0.729167	0.0221007	0.686275	0.015686	0.777778	0.0221875	0.673077	0.0184914	0.777778	0.0536256	0.7	0.0189516	0.795455	0.0487156
0.642857	0.0190977	0.782609	0.0513571	0.642857	0.0186806	0.765957	0.0452432	0.782609	0.0425735	0.679245	0.0215299	0.75	0.0228249	0.734694	0.023689	0.75	0.0310722	0.705882	0.0154805	0.8	0.0240724	0.692308	0.018528	0.8	0.072042	0.72	0.0177367	0.818182	0.0696428
0.660714	0.0191549	0.804348	0.061346	0.660714	0.0180489	0.787234	0.059863	0.804348	0.0461925	0.698113	0.0219445	0.770833	0.0265604	0.755102	0.026311	0.770833	0.0424508	0.72549	0.0161655	0.822222	0.0297808	0.711538	0.0186379	0.822222	0.0750331	0.74	0.0169471	0.840909	0.0751319
0.678571	0.0195551	0.826087	0.0610433	0.678571	0.0171465	0.808511	0.0653632	0.826087	0.042674	0.716981	0.0224776	0.791667	0.0363845	0.77551	0.0363472	0.791667	0.0487965	0.745098	0.0210973	0.844444	0.0365663	0.730769	0.0185646	0.844444	0.0629834	0.76	0.0164004	0.863636	0.0661263
0.696429	0.0195551	0.847826	0.0498436	0.696429	0.0166952	0.829787	0.0642632	0.847826	0.0344308	0.735849	0.0228626	0.8125	0.0459733	0.795918	0.05434	0.8125	0.043326	0.764706	0.032468	0.866667	0.0406592	0.75	0.0186379	0.866667	0.0392685	0.78	0.0176153	0.886364	0.0444273
0.714286	0.019841	0.869565	0.0348098	0.714286	0.0172367	0.851064	0.0576984	0.869565	0.0267907	0.754717	0.0247283	0.833333	0.0468851	0.816327	0.0680832	0.833333	0.0316557	0.784314	0.0543873	0.888889	0.0394205	0.769231	0.018528	0.888889	0.0217921	0.8	0.0222924	0.909091	0.0235859
0.732143	0.0202413	0.891304	0.0245182	0.732143	0.0178684	0.87234	0.0407722	0.891304	0.0210606	0.773585	0.0294074	0.854167	0.0416789	0.836735	0.0625678	0.854167	0.0221736	0.803922	0.0761696	0.911111	0.0324735	0.788462	0.0210179	0.911111	0.0147417	0.82	0.0314645	0.931818	0.0153952
0.75	0.0199554	0.913043	0.0183634	0.75	0.0191318	0.893617	0.0221426	0.913043	0.0166876	0.792453	0.0351823	0.875	0.0295606	0.857143	0.0448463	0.875	0.0164114	0.823529	0.0776081	0.933333	0.0235338	0.807692	0.0284877	0.933333	0.011067	0.84	0.0386321	0.954545	0.0113641
0.767857	0.0196695	0.934783	0.0127131	0.767857	0.0238246	0.914894	0.0154359	0.934783	0.0120131	0.811321	0.0385287	0.895833	0.0165304	0.877551	0.028481	0.895833	0.0129832	0.843137	0.0567162	0.955556	0.016156	0.826923	0.0401318	0.955556	0.00760586	0.86	0.0354735	0.977273	0.00793344
0.785714	0.0229287	0.956522	0.00706286	0.785714	0.0336612	0.93617	0.0136262	0.956522	0.00608193	0.830189	0.0376403	0.916667	0.00985352	0.897959	0.0178119	0.916667	0.0101386	0.862745	0.0334954	0.977778	0.0113092	0.846154	0.0485536	0.977778	0.0041875	0.88	0.0274555	1	0.00488872
0.803571	0.0333352	0.978261	0.00242155	0.803571	0.0462955	0.957447	0.0122423	0.978261	0.00140739	0.849057	0.032665	0.9375	0.00611801	0.918367	0.0116637	0.9375	0.00787746	0.882353	0.0215083	1	0.00737789	0.865385	0.0445624	1	0.00192283	0.9	0.0183442
0.821429	0.0485448	1	0.000201796	0.821429	0.0548687	0.978723	0.00968738	1	0.000150792	0.867925	0.0271863	0.958333	0.0028237	0.938776	0.00867993	0.958333	0.00627279	0.901961	0.01733			0.884615	0.0322959			0.92	0.0104477
0.839286	0.0573503			0.839286	0.0503565	1	0.00567758			0.886792	0.0233068	0.979167	0.00067651	0.959184	0.00641953	0.979167	0.0051787	0.921569	0.0142476			0.903846	0.0223361			0.94	0.0054668
0.857143	0.0523758			0.857143	0.0361881					0.90566	0.0209968	1	0	0.979592	0.00316456	1	0.00539752	0.941176	0.00986369			0.923077	0.0163676			0.96	0.00170078
0.875	0.0377952			0.875	0.0240953					0.924528	0.0186573			1	0.000994575			0.960784	0.00534283			0.942308	0.0129623			0.98	0.000121485
0.892857	0.0248728			0.892857	0.0180489					0.943396	0.0154885							0.980392	0.00164395			0.961538	0.0109118			1	0.000182227
0.910714	0.01824			0.910714	0.0157026					0.962264	0.0115497							1	6.84978e-05			0.980769	0.00798242
0.928571	0.0147521			0.928571	0.0137172					0.981132	0.00734445											1	0.00421091
0.946429	0.0122363			0.946429	0.00974641					1	0.00373145
0.964286	0.0101206			0.964286	0.00604639
0.982143	0.00811939			0.982143	0.00370003
1	0.00474584			1	0.00451223
