# Supplementary material for: Asymmetric localization of the cell division machinery during Bacillus subtilis sporulation
Source: eLife. 2021 May 21;10:e62204. doi: 10.7554/eLife.62204 (PMC8192124; doi:10.7554/eLife.62204)
Supplement: Figure 5—source data 1. [file elife-62204-fig5-data1.xlsx]

## Sheet: Sheet1
WT			KK240
S.No.	Distance of membrane-proximal ring from membrane (nm)	Distance of membrane-distal ring from membrane (nm)	S.No.	Distance of membrane-proximal ring from membrane (nm)	Distance of membrane-distal ring from membrane (nm)
1	6.19	12.79	1	6.91	18.14
2	6.94	14.87	2	6.01	18.03
3	7.44	15.71	3	7.04	17.68
4	7.44	15.05	4	6.61	20.28
5	6.14	14.07	5	6.29	19.84
6	7.52	15.45
7	7.65	16.21
8	7.06	13.63
Mean	7.05	14.72		6.57	18.79
Std Dev.	0.59	1.15		0.43	1.18
