# Supplementary material for: Asymmetric localization of the cell division machinery during Bacillus subtilis sporulation
Source: eLife. 2021 May 21;10:e62204. doi: 10.7554/eLife.62204 (PMC8192124; doi:10.7554/eLife.62204)
Supplement: Figure 7—source data 1. [file elife-62204-fig7-data1.xlsx]

## Sheet: Sheet1
Cell no.	Sporulating septum thickness (nm)	Vegetative septum thickness (nm)
1	24.28	51.82
2	21.1	53.56
3	25.83	49.45
4	27.01	46.92
5	27.71	46.62
6	27.92
7	23.91
Mean (nm)	25.39	49.67
Std. Dev. (nm)	2.46	3.03
