# Supplementary material for: Asymmetric localization of the cell division machinery during Bacillus subtilis sporulation
Source: eLife. 2021 May 21;10:e62204. doi: 10.7554/eLife.62204 (PMC8192124; doi:10.7554/eLife.62204)
Supplement: Figure 7—source data 2. [file elife-62204-fig7-data2.xlsx]

## Sheet: Sheet1
Cell no. 1	Distance spanned by FtsZ bundle (sporulating cell)	Distance spanned by FtsZ bundle (vegetative cell)
1	27.04	53.3655
2	25.33	54.73
3	27.366	51.08
4	22.1535	49.8
5	32.06	47.288
6		54.2575
Mean (nm)	26.7899	51.7535
Std. Dev. (nm)	3.59847	2.89615
