# Supplementary material for: Asymmetric localization of the cell division machinery during Bacillus subtilis sporulation
Source: eLife. 2021 May 21;10:e62204. doi: 10.7554/eLife.62204 (PMC8192124; doi:10.7554/eLife.62204)
Supplement: Figure 8—source data 1. [file elife-62204-fig8-data1.xlsx]

## Sheet: Sheet1
Cell no.	Sporulating septum thickness (nm)	Vegetative septum thickness (nm)	SpoIIE septum thickness (nm)	spoIIE-∆regII septum thickness (nm)	spoIIE-∆regI septum thickness (nm)	malF-spoIIE septum thickness (nm)
1	24.28	51.82	41.72	42.04	44.4	41.37
2	21.1	53.56	36.35		46.65	44.14
3	25.83	49.45	40.81		37.61	42.75
4	27.01	46.92	42.3			46.94
5	27.71	46.62	48.51			48.84
6	27.92		45.09			40.84
7	23.91					44.75
8						49.58
9						42.26
Mean (nm)	25.39	49.67	42.46	42.04	42.8867	44.6078
Std. Dev. (nm)	2.46	3.03	4.1	N/A	4.70617	3.2007
